# Supplementary material for: Push-Pull Heterocyclic Dyes Based on Pyrrole and Thiophene: Synthesis and Evaluation of Their Optical, Redox and Photovoltaic Properties
Source: MDPI journal article supplement (doi:10.3390/coatings12010034), 2021-12-28
Supplement: s1 [file s1]

# Supplementary Materials: Push-Pull Heterocyclic Dyes Based on Pyrrole and Thiophene: Synthesis and Evaluation of Their Optical, Redox and Photovoltaic Properties

Sara S. M. Fernandes <sup>1</sup>, Maria Cidália R. Castro <sup>1</sup>, Dzmitry Ivanou <sup>2</sup>, Adélio Mendes <sup>2</sup> and Maria Manuela M. Raposo <sup>1,\*</sup>

<sup>1</sup> Centro de Química, Universidade do Minho, Campus de Gualtar, 4710-057 Braga, Portugal; sarasmfernandes@gmail.com (S.S.M.F.); cidaliacastro@quimica.uminho.pt (M.C.R.C.)

<sup>2</sup> LEPABE, Departamento de Engenharia Química, Faculdade de Engenharia, Universidade do Porto, 4200-465 Porto, Portugal; ivanou@fe.up.pt (D.I.); mendes@fe.up.pt (A.M.)

\* Correspondence: mfox@quimica.uminho.pt; Tel.: +351-253-604381; Fax: +351-253-604382

**Citation:** Fernandes, S.S.M.; Castro, M.C.R.; Ivanou, D.; Mendes, A.; Raposo, M.M.M. Push-Pull Heterocyclic Dyes Based on Pyrrole and Thiophene: Synthesis and Evaluation of Their Optical, Redox and Photovoltaic Properties. *Coatings* **2022**, *11*, x. <https://doi.org/10.3390/xxxxx>

Academic Editor(s):  
Rodica Mariana Ion;  
Alessandro Latini

Received: 29 November 2021

Accepted: 23 December 2021

Published: date

**Publisher's Note:** MDPI stays neutral with regard to jurisdictional claims in published maps and institutional affiliations.

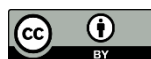

**Copyright:** © 2022 by the authors. Licensee MDPI, Basel, Switzerland. This article is an open access article distributed under the terms and conditions of the Creative Commons Attribution (CC BY) license (<http://creativecommons.org/licenses/by/4.0/>).

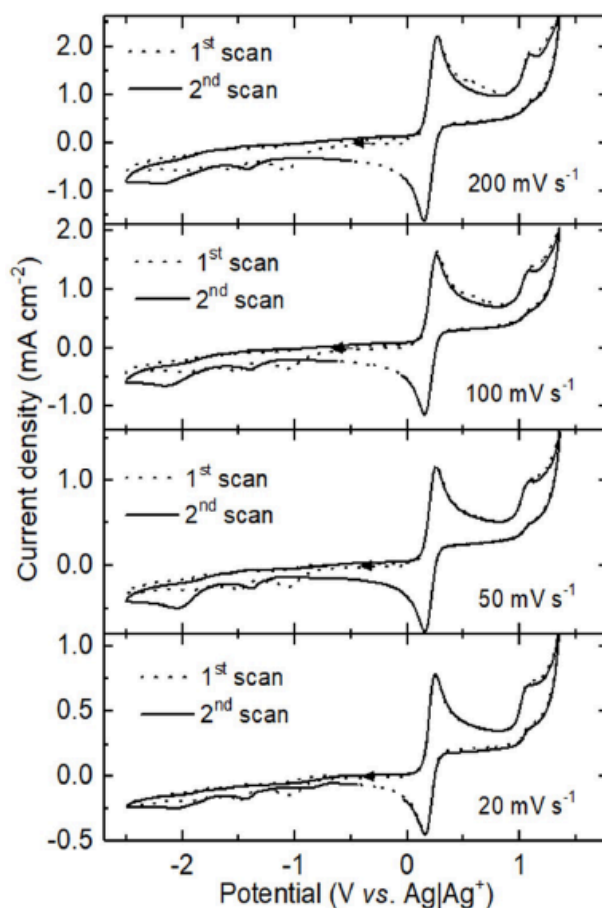

**Figure S1.** Cyclic voltammetry plots of compound 2-cyano-3-(5'-(4''-ethoxyphenyl)thieno[3,2-*b*]thiophen-2'-yl)acetic acid (**5**), in dry DMF ( $C = 10^{-4}$  M). All the experiments were performed using glassy carbon as working electrode, a platinum wire as counter electrode, and acetonitrile  $\text{Ag}/\text{Ag}^+$  electrode as reference.  $[\text{NBu}_4][\text{BF}_4]$  (0.1 M) was used as supporting electrolyte and the collected data were referenced to the potential of  $\text{Fc}/\text{Fc}^+$  couple.

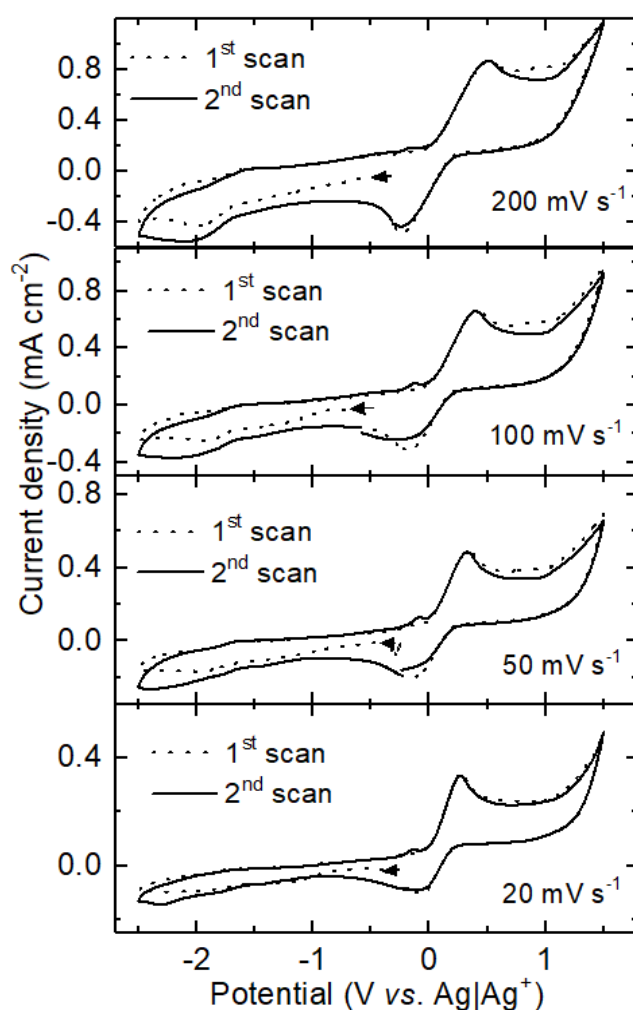

**Figure S2.** Cyclic voltammetry plots of compound 2-cyano-3-(5'-(4''-(1*H*-pyrrol-1'''-yl)phenyl)thiophen-2'-yl)acetic acid (**6**), in dry DMF ( $C = 10^{-4}$  M). All the experiments were performed using glassy carbon as working electrode, a platinum wire as counter electrode, and acetonitrile Ag/Ag<sup>+</sup> electrode as reference. [NBu<sub>4</sub>][BF<sub>4</sub>] (0.1 M) was used as supporting electrolyte and the collected data were referenced to the potential of Fc/Fc<sup>+</sup> couple.

17

18

19

20

21

22

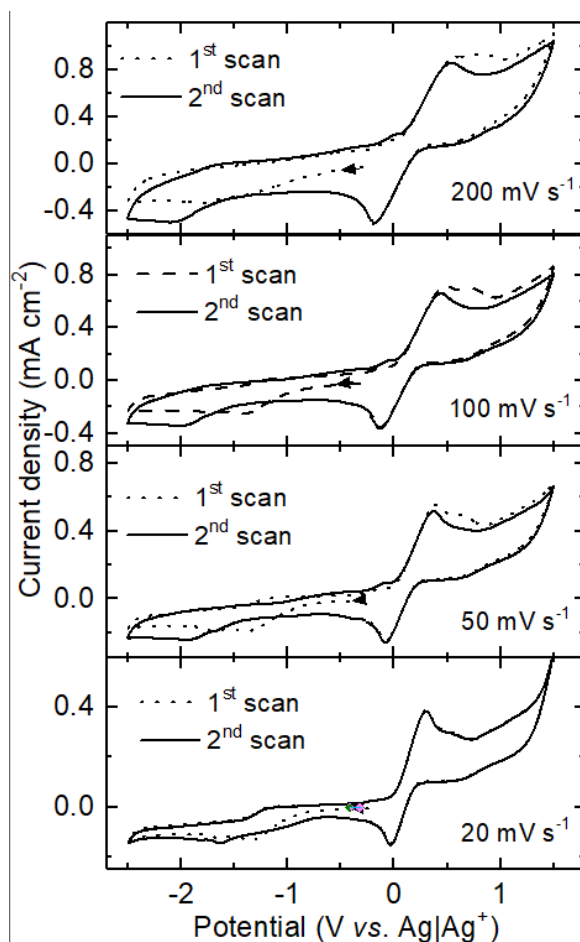

**Figure S3.** Cyclic voltammetry plots of compound 3,3-(thiophene-2'',5''-diyl-bis(1'-methyl-1*H*-pyrrole-5',2'-diyl))-bis(2-cyanoacetic acid) (**7**), in dry DMF ( $C = 10^{-4}$  M). All the experiments were performed using glassy carbon as working electrode, a platinum wire as counter electrode, and acetonitrile  $\text{Ag}/\text{Ag}^+$  electrode as reference.  $[\text{NBu}_4][\text{BF}_4]$  (0.1 M) was used as supporting electrolyte and the collected data were referenced to the potential of  $\text{Fc}/\text{Fc}^+$  couple.

23

24

25

26

27

28
